# Supplementary material for: Optimizing the Timeframe to Produce Polychaetes (Hediste diversicolor) Enriched With Essential Fatty Acids Under Different Combinations of Temperature and Salinity
Source: Frontiers journal article supplement (doi:10.3389/fmars.2021.671545), 2021-05-11
Supplement: Table_1.XLSX [file Table_1.XLSX]

## Sheet: FA_Aquafeed
		Fatty acid (FA) profile (µg mg-1 DW) of the commercial aquafeed (WIN flat - SPAROS) supplied to Hediste diversicolor.
Treatment	Replicate	14:0	16:0	16:1 n-7	18:0	18:1 n-9	18:1 n-7	18:2 n-6 (LA)	18:3 n-3 (ALA)	20:1 n-13	20:1 n-11	20:1 n-9	20:4 n-6 (ARA)	20:5 n-3 (EPA)	22:1 n-11	22:5 n-3 (DPA)	22:6 n-3 (DHA)
Aquafeed	1	6.15873	19.4804	4.78729	5.26061	13.6279	4.88626	12.0922	2.74561	1.0763	2.36499	1.18381	1.30807	6.75515	2.79074	1.62052	5.72768
Aquafeed	2	7.02383	22.6219	5.4972	5.79762	15.1169	5.39586	13.5307	2.94099	1.06575	2.58193	1.17414	1.31729	7.55435	2.73421	1.62216	6.22701
Aquafeed	3	7.92907	23.6986	6.13667	5.07349	16.6155	5.89229	14.9091	3.24047	1.07507	2.8409	1.21531	1.34998	8.40514	2.83533	1.72026	6.67062
Aquafeed	4	8.32326	24.8021	6.7576	5.09516	17.7759	6.29319	15.6618	3.41047	1.17242	2.98086	1.24481	1.37607	8.95989	3.32757	1.68674	7.19884
Aquafeed	5	7.77073	23.5634	6.10235	4.6292	17.1545	5.96653	15.3977	3.33591	1.10249	2.86072	1.16871	1.39784	8.81186	3.02016	1.79412	7.04718

## Sheet: FA_Initial & Wild Polychaetes
Fatty acid profile (µg mg-1 DW) of Hediste diversicolor initially stocked (Initial) and conspecifics collected from the wild at the same time periods of polychaetes subjected to Aquafeed (Wild10, Wild20 and Wild40).
Treatment	Replicate	14:0	16:0	16:1 n-7	18:0	18:1 n-14	18:1 n-9	18:1 n-7	18:2 n-6 (LA)	18:3 n-3 (ALA)	20:1 n-13	20:1 n-11	20:1 n-9	20:2 n-6	20:4 n-6 (ARA)	20:5 n-3 (EPA)	Δ7,13 - 22:2	22:4 n-6 (Ada)	22:5 n-3 (DPA)
Initial	1	0.401894	3.91943	0.872799	2.40519	2.07799	1.53039	1.97039	0.735274	1.03423	1.21703	0.904744	0.732212	0.989122	1.70727	3.34779	1.07778	1.33793	1.33689
Initial	2	0.420615	4.22619	1.27287	2.40348	2.15077	1.50537	1.92048	0.715864	1.10577	1.28904	0.897596	0.759484	1.08085	1.88699	3.38921	1.1131	1.43902	1.36871
Initial	3	0.411257	4.63926	0.863078	2.37177	2.2829	1.47352	2.0514	0.676865	1.07157	1.2206	0.909494	0.728839	0.97881	1.73274	3.43207	1.06382	1.29347	1.34282
Initial	4	0.422046	4.01765	1.16759	2.43563	2.19223	1.52863	1.91528	0.667913	0.951781	1.46255	0.932864	0.76209	1.08523	1.73031	3.23616	1.15648	1.46165	1.34615
Initial	5	0.39714	3.89357	1.07003	2.60198	2.20136	1.38682	1.97606	0.699887	1.0343	1.38427	0.902111	0.767849	1.05007	1.7873	3.12095	1.16431	1.42252	1.32996
Wild10	1	0.386001	4.27089	0.76722	2.55539	1.9829	1.43281	1.87863	0.698131	0.999171	1.21725	0.848276	0.715673	1.02589	1.80589	3.73151	1.16598	1.55974	1.59308
Wild10	2	0.415595	4.67136	1.02619	2.60438	2.19206	1.48156	2.07367	0.765728	1.07069	1.42843	0.921832	0.769461	1.07803	2.13218	4.48545	1.28843	1.89556	1.88393
Wild 10	3	0.415533	4.45209	1.09835	2.32853	2.11109	1.46568	1.97115	0.776871	0.967668	1.31115	0.911229	0.76228	1.07215	2.32818	4.41264	1.26206	2.03554	1.74728
Wild 10	4	0.416539	3.77632	0.959235	2.30315	1.93056	1.45655	1.87427	0.729775	0.971664	1.22745	0.877677	0.756341	0.962277	2.03458	3.60363	1.22653	1.85112	1.604
Wild 10	5	0.383454	4.07425	0.792352	2.23301	2.02479	1.49587	1.89097	0.730077	0.942867	1.1998	0.871218	0.720315	1.04621	2.14284	4.08104	1.19522	1.90912	1.61741
Wild 20	1	0.458301	4.91473	0.739781	2.10453	2.0885	1.52383	2.15573	0.708705	1.04594	1.30353	0.873609	0.781246	1.14323	2.00452	4.04725	1.20447	1.6152	1.65176
Wild 20	2	0.437655	4.55361	1.16983	2.08438	2.03575	1.49881	2.07701	0.650312	1.07861	1.21582	0.838279	0.764067	1.0696	1.86581	3.67892	1.15633	1.54153	1.63033
Wild 20	3	0.44204	4.57714	0.918886	2.0009	2.02534	1.54349	2.04686	0.654992	1.03523	1.24908	0.858806	0.759108	0.935809	1.68074	3.29516	1.15549	1.43565	1.4642
Wild 20	4	0.478953	5.68511	0.811205	2.22592	2.26459	1.528	2.27464	0.762238	1.1089	1.28579	0.880063	0.73649	0.926499	2.00049	4.07081	1.18178	1.60401	1.70044
Wild 20	5	0.444318	5.16359	0.770217	2.13372	2.17538	1.4183	2.29154	0.808132	1.10498	1.34225	0.858386	0.759511	1.0535	2.26937	5.07123	1.27285	1.88454	1.91154
Wild 40	1	0.439391	5.94078	1.1289	3.02219	2.13513	1.46162	2.16844	0.693791	1.04229	1.24743	0.940874	0.730705	1.12626	2.20349	3.9676	1.11322	1.65672	1.50775
Wild 40	2	0.496356	7.25458	1.18577	2.81692	2.36378	1.57285	2.33363	0.757381	1.08232	1.17659	0.863454	0.723516	1.03094	1.99844	3.5945	1.07767	1.38061	1.28395
Wild 40	3	0.487179	6.70734	0.918597	2.59948	2.34066	1.54088	2.33764	0.755873	1.06984	1.19806	0.859714	0.726775	1.00138	2.06001	3.7036	1.07892	1.4515	1.39499
Wild 40	4	0.510007	9.12896	1.26936	3.22344	2.38783	1.51801	2.41469	0.667512	1.0119	1.09718	0.880988	0.703201	0.951949	1.50787	3.01816	1.02201	1.23395	1.24287
Wild 40	5	0.511137	6.92707	1.24887	2.95056	2.39064	1.44515	2.3564	0.699115	1.08404	1.24641	0.949659	0.73099	0.954756	1.86033	3.61054	1.08389	1.35423	1.41903

## Sheet: FA polychaetes fed Aquafeed
Fatty acid profile (µg mg-1 DW) of Hediste diversicolor fed during 10, 20 and 40 days (D10, D20 and D40) with a commercial aquafeed under different combinations of temperature (T – 20 and 25 ºC) and salinity (S – 15, 20 and 25).
Treatment	Samples	Replicate	14:0	16:0	16:1 n-7	18:0	18:1 n-14	18:1 n-9	18:1 n-7	18:2 n-6 (LA)	18:3 n-3 (ALA)	20:1 n-13	20:1 n-11	20:1 n-9	Δ5,11 - 20:2	20:2 n-6	20:4 n-6 (ARA)	20:3 n-3 (ETE)	20:4 n-3 (ETA)	20:5 n-3 (EPA)	22:1 n-11	Δ7,13 - 22:2	Δ7,13,16 - 22:3	22:4 n-6 (Ada)	22:5 n-3 (DPA)	22:6 n-3 (DHA)
T20.S15	D10	1	0.760793	4.53748	1.00644	1.96224	2.16225	2.23353	2.0165	1.56956	1.09377	1.36563	1.05361	0.728002	1.09571	1.16325	1.61328			3.58647	0.83913	1.22892		1.32417	1.32417	1.08474
T20.S15	D10	2	0.824524	6.84779	1.0691	2.28978	2.28698	2.98679	2.33378	2.07333	1.02816	1.44825	1.25453	0.745548	1.08476	1.31164	1.5556			3.13085	0.842042	1.24498		1.38617	1.27219	1.03064
T20.S15	D10	3	0.99149	6.65617	1.06561	2.38102	2.57499	3.09197	2.43208	2.29221	1.10443	1.45996	1.14893	0.746884	0.945827	1.2552	1.5126			3.54674	1.0437	1.26995		1.21305	1.1808	1.10472
T20.S15	D10	4	0.981759	6.97747	1.22356	2.46701	2.26197	3.72581	2.59108	2.92568	1.18766	1.46494	1.51201	0.773349	1.1799	1.68746	1.84523			4.24496	1.06399	1.43336		1.78473	1.54002	1.53257
T20.S15	D10	5	0.961159	8.09556	1.19238	2.59781	2.36435	3.49159	2.57709	2.52266	1.1135	0.768874	1.27869	0.754996	1.19443	1.38285	1.5789			3.71944	0.975102	1.36801		1.38298	1.3462	1.15844
T20.S20	D10	1	0.94126	7.23335	1.31068	2.69457	2.55641	4.09774	2.84861	3.35406	1.28646	1.61735	1.61625	0.804189	1.20815	1.67543	1.79039			4.47211	1.07333	1.36847		1.53355	1.58934	1.39388
T20.S20	D10	2	0.473599	2.81405	0.994467	1.74987	1.78727	1.84893	1.86939	1.04735	0.894684	1.17387	0.945288	0.742935	0.93428	1.04754	1.01641			1.78341	0.947333	1.12393		0.9006	1.15099	0.810212
T20.S20	D10	3	0.90449	7.51953	0.656748	2.64662	2.5801	3.54015	2.95914	2.90612	1.4165	1.79765	1.45802	0.819384	0.977439	1.5317	1.66159			4.89824	1.17477	1.44279		1.3621	1.66487	1.25772
T20.S20	D10	4	0.766922	4.88068	0.937013	2.23191	2.04352	3.47309	2.40701	2.22841	1.02614	1.31468	1.34643	0.729796	0.94356	1.36743	1.2201			2.35912	0.981188	1.21577		1.03943	1.1711	1.04963
T20.S20	D10	5	0.847577	6.59854	1.23127	2.33263	2.00928	2.87213	2.11698	1.34531	0.93404	1.21172	1.14212	0.731596	0.921981	1.08444	1.13477			1.94185	0.981129	1.11801		0.980224	1.07461	0.891494
T20.S25	D10	1	0.651167	5.87663	1.03176	2.50594	1.90214	3.03508	2.16657	1.97847	0.95683	1.19056	1.22186	0.731879	1.05327	1.31131	1.25379			2.27673	0.925748	1.20484		1.14758	1.1342	0.859628
T20.S25	D10	2	0.738162	6.04929	0.917553	2.42516	1.90261	2.95011	2.15926	1.31096	0.938817	1.18086	1.22327	0.774663	1.08318	1.11924	0.981431			1.6333	0.979531	1.16728		0.842994	1.06272	0.882521
T20.S25	D10	3	1.33718	10.9758	1.69465	3.10546	2.53146	4.66463	3.08017	3.48469	1.20201	1.44333	1.62252	0.74158	1.21106	1.8146	1.77153			4.72464	0.905452	1.28763		1.38273	1.4708	1.3672
T20.S25	D10	4	0.765252	4.77756	0.905232	2.91387	1.92597	2.87098	2.1778	1.86403	1.01673	1.20776	1.21538	0.762461	1.04809	1.24415	1.21014			2.03766	0.970309	1.26487		1.1086	1.16298	0.893022
T20.S25	D10	5	0.886998	6.92453	1.73143	3.02545	2.17674	3.81013	2.62162	2.85194	1.17699	1.35495	1.49498	0.782272	1.10432	1.41881	1.31269			3.00259	1.09275	1.31095		1.15552	1.24562	1.09303
T25.S15	D10	1	1.05224	9.49866	0.907367	3.31331	1.91194	2.74332	1.96397	1.5655	1.0546	1.09812	1.08527	0.716355	1.06882	1.13816	1.05007			1.89329	0.907021	1.06822		1.03042	0.996263	0.927795
T25.S15	D10	2	0.769439	6.84248	0.985089	2.53079	1.93124	3.35127	2.34378	2.36189	1.04445	1.32897	1.41775	0.750451	1.1156	1.45157	1.3275			2.71138	0.947353	1.25367		1.07605	1.16571	1.02314
T25.S15	D10	3	0.726636	4.43566	1.22494	1.84914	1.68165	2.12081	1.78491	1.50545	1.00932	1.16545	1.06295	0.709083	1.04569	1.16667	1.19073			2.61853	0.91702	1.13967		0.980905	1.15312	1.06762
T25.S15	D10	4	1.56875	11.4786	1.21529	2.67327	2.16219	3.27879	2.40809	2.41873	1.12677	1.40191	1.31211	0.744995	1.16423	1.40018	1.54473			3.57092	0.93711	1.25332		1.24626	1.25525	1.17565
T25.S15	D10	5	0.978556	7.60535	1.04078	2.64968	2.09737	3.70879	2.50319	2.94344	1.14907	1.45366	1.4422	0.763548	1.12487	1.54425	1.51603			3.78476	1.02515	1.32103		1.27411	1.43694	1.37714
T25.S20	D10	1	1.16566	11.8129	1.46174	5.10781	2.1592	4.42566	2.9371	3.4691	1.22479	1.2692	1.50124	0.719632	1.0968	1.61582	1.49451			4.0673	0.86341	1.14399		1.25001	1.3078	1.08045
T25.S20	D10	2	1.08299	9.77561	1.34054	4.14251	2.42944	3.71886	2.5727	2.94914	1.1633	1.55552	1.49732	0.731744	1.14176	1.73797	1.54792			4.25599	0.987188	1.33207		1.2825	1.39648	1.20558
T25.S20	D10	3	1.07635	8.84425	1.05851	3.11798	2.06267	4.08588	2.73969	1.51603	0.954284	1.39208	1.37319	0.790171	1.37738	1.11253	0.996408			1.84515	0.859599	1.12877		0.953261	1.08346	1.50669
T25.S20	D10	4	0.65026	7.04196	1.61562	2.27833	2.04795	3.13567	2.31439	2.25487	1.19683	1.43244	1.24291	0.789426	1.17018	1.38743	1.44106			3.56872	0.914115	1.26988		1.32611	1.42341	2.51761
T25.S20	D10	5	1.10826	8.41951	1.10728	2.53485	2.13024	4.41561	2.85812	3.06201	1.16231	1.60273	1.44844	0.829354	1.2155	1.38735	1.38027			3.24906	1.02533	1.27839		1.22684	1.34295	2.51591
T25.S25	D10	1	1.26341	10.0953	1.47573	2.93309	2.1971	4.72017	3.08759	3.50117	1.13542	1.76956	1.694	0.908302	1.21539	1.84751	1.35031			3.79054	1.98192	1.40185		1.36793	1.37595	2.29826
T25.S25	D10	2	1.28718	10.7203	1.79487	3.07726	2.32384	5.09058	3.22816	2.8156	1.10286	1.79019	1.88904	0.905486	1.31528	1.70561	1.2801			2.5777	2.0043	1.32635		1.23141	1.15216	1.68489
T25.S25	D10	3	0.9253	7.30401	1.02079	2.33292	2.11974	3.27731	2.40689	2.02339	1.0668	1.52035	1.29032	0.771436	1.22151	1.29031	1.41054			2.95003	1.50805	1.22194		1.24084	1.21969	1.41723
T25.S25	D10	4	0.97037	9.68877	1.04256	2.60072	2.11622	4.44656	2.8635	3.45909	1.1917	1.67574	1.45063	0.878627	1.40423	1.57329	1.69546			4.35567	2.08706	1.269		1.49947	1.50478	2.37105
T25.S25	D10	5	1.25459	9.01179	1.28233	2.63822	2.19701	4.21919	2.83607	1.71355	1.02022	1.63522	1.50957	0.895034	1.28813	1.22992	1.1911			2.08163	1.72739	1.21641		1.12805	1.12445	1.35618
T20.S15	D20	1	1.44439	11.0846	1.72684	3.04696	2.38931	5.46438	3.25199	4.17777	1.24108	0.911489	1.4117	0.718311	1.22541	2.20047	1.43205			3.44212	1.70342	1.29303	1.08898	1.27488	1.16399	1.92024
T20.S15	D20	2	1.7363	12.1744	2.12947	3.28087	2.56026	6.16357	3.58187	5.2761	1.47888	1.02715	1.63169	0.728628	1.28631	2.77042	1.75088			5.32321	1.49639	1.3975	1.16829	1.54696	1.5292	2.32402
T20.S15	D20	3	1.73135	13.694	1.93084	3.3582	2.36133	6.47246	3.80551	5.91016	1.43988	1.16878	2.19716	0.768434	1.17897	3.06786	1.69499			5.3163	2.13242	1.46048	1.14747	1.41102	1.30962	2.56525
T20.S15	D20	4	1.62773	10.8272	1.48545	2.85059	2.00297	5.76854	3.1393	1.64342	0.920823	1.12596	1.59097	0.741857	1.25187	1.22197	0.840475			1.56362	1.7009	1.17619	0.965403	0.895647	1.01294	1.16108
T20.S15	D20	5	2.03175	14.2788	2.23516	3.57528	2.56131	7.56815	3.91749	5.45606	1.26779	1.64712	2.61778	0.811994	1.21416	2.17761	1.50731			3.21166	1.65413	1.31692	1.0467	1.26173	1.11919	1.39187
T20.S20	D20	1	2.18456	15.2231	2.63595	4.21848	2.21474	8.32926	4.13672	6.14996	1.28559	1.34739	2.38427	0.786711	1.18988	2.38671	1.04622			2.29968	1.22235	1.29795	1.00297	0.905801	1.05901	0.965549
T20.S20	D20	2	1.36974	11.3525	1.48025	3.217	2.22434	5.18791	3.06602	3.41782	1.02402	1.38012	1.89947	0.801664	1.1846	1.93837	1.13568			2.2795	1.368	1.33293	1.00622	0.989268	1.07786	0.971991
T20.S20	D20	3	1.82411	13.5741	2.41323	3.66453	2.56887	7.66687	4.2075	6.39641	1.50613	1.62868	2.64637	0.805762	1.41081	3.43037	1.61959			4.31441	1.44419	1.48851	1.08572	1.44791	1.37679	1.56051
T20.S20	D20	4	1.84524	12.3826	2.04159	3.05247	2.27915	6.43857	3.84944	3.41135	1.09458	1.41627	1.97678	0.804227	1.19289	1.76235	1.06678			2.06029	1.27444	1.26129	0.98335	0.969177	1.05037	0.889792
T20.S20	D20	5	2.18649	15.8642	2.73432	4.041	2.51483	9.42967	4.55	8.35378	1.65971	1.60479	2.68505	0.832903	1.37442	3.28151	1.75905			5.30882	1.68166	1.5434	1.06163	1.38323	1.36579	2.03432
T20.S25	D20	1	2.0519	15.7046	2.48856	3.98863	2.88422	8.04691	4.86818	6.65733	1.69575	1.94686	2.54049	0.861231	1.33199	3.29059	1.43592			4.37333	1.33133	1.68362	1.14701	1.267	1.54007	1.67718
T20.S25	D20	2	1.82633	12.979	2.44172	3.52051	2.5252	8.05273	4.31336	6.17442	1.38189	1.7551	2.54823	0.907329	1.20264	2.58351	1.54023			3.5721	1.20482	1.53381	1.0641	1.35466	1.1882	1.92467
T20.S25	D20	3	2.0883	17.0709	2.15061	4.4389	2.43834	7.46856	4.2587	6.03331	1.51997	1.73278	2.6373	0.968293	1.32846	2.98677	1.62535			5.53876	1.3019	1.47196	1.16153	1.45872	1.43146	2.45822
T20.S25	D20	4	1.73275	12.4685	1.93429	3.28727	2.29443	6.61377	3.50249	5.94283	1.47105	1.39556	2.34109	0.790683	1.24006	2.83188	1.47347			5.11345	2.25612	1.38802	1.05884	1.20403	1.40553	1.89343
T20.S25	D20	5	1.70226	12.1521	2.00244	3.18094	2.02028	6.52429	3.57818	4.3827	1.18776	1.4543	2.00047	0.900412	1.32176	1.89192	1.12606			2.71455	1.86953	1.2947	1.024	0.98603	1.15678	1.75523
T25.S15	D20	1	1.241	10.1765	1.47052	3.72565	1.77825	4.98065	2.7231	3.95791	1.14367	1.15035	1.81366	0.731431	1.16091	1.98609	1.25632			3.36369	1.11374	1.16976	0.968405	1.00901	1.16359	1.3007
T25.S15	D20	2	4.04896	25.6523	3.2799	5.16719	2.69532	10.018	4.89025	7.87909	1.49876	1.41006	3.13854	0.777477	1.44475	3.2804	1.35296			3.90946	1.03092	1.27468	1.00315	0.995929	1.11859	1.31363
T25.S15	D20	3	2.1475	18.0353	2.16337	4.04755	2.43742	6.61723	3.69471	5.6291	1.44589	1.25461	2.19873	0.752281	1.26913	2.83089	1.46637			5.35192	1.09497	1.21914	0.939134	1.07265	1.22191	1.52867
T25.S15	D20	4	2.79903	21.4821	2.27004	4.37687	2.20995	7.5229	3.65985	6.06578	1.31475	1.10952	2.31204	0.748579	1.22856	2.49206	1.42525			3.97189	1.00178	1.1585	0.924887	1.04986	1.06265	1.33742
T25.S15	D20	5	1.92297	16.5371	1.9127	3.53392	2.05287	6.22484	3.29467	4.99352	1.24857	1.07149	1.79772	0.725079	1.13247	1.69052	1.25432			3.54123	0.909622	1.09926	0.903978	0.970855	1.12191	1.08618
T25.S20	D20	1	1.8267	15.348	1.73755	3.27821	1.97603	5.57451	3.14084	4.53071	1.19312	1.0856	1.6819	0.737759	1.08662	1.82296	1.04959			3.59527	0.861264	1.07131	0.969514	0.931991	1.09261	1.12965
T25.S20	D20	2	1.04316	10.0866	1.21991	2.91701	1.89829	4.92995	2.75961	4.2883	1.18376	1.15637	1.76527	0.746996	0.948355	1.96041	1.26399			3.91563	1.1589	1.15732	0.975937	0.968245	1.12004	1.17881
T25.S20	D20	3	1.20491	10.854	1.57165	3.56965	2.25795	5.05229	3.22327	4.17154	1.30478	1.35755	2.11159	0.740841	1.19127	2.84146	1.42774			4.64688	0.896232	1.31121	1.04073	1.15928	1.28646	1.45373
T25.S20	D20	4	2.22401	18.4485	2.51026	5.24088	2.64377	9.0834	4.8279	7.92668	1.71536	0.780505	3.54282	0.783854	1.73913	4.75502	1.93216			7.30376	1.24107	1.6254	1.17276	1.60622	1.60836	2.86263
T25.S20	D20	5	1.14586	10.8964	1.41442	3.66045	1.90221	5.17681	2.83509	4.37199	1.19204	1.13582	1.93392	0.728638	1.07107	2.28552	1.34226			4.68536	0.967462	1.14253	0.951005	1.05798	1.15712	1.27793
T25.S25	D20	1	1.39167	13.1937	1.79442	3.35505	1.92021	6.41482	3.21861	5.42912	1.24062	1.26088	2.00905	0.721272	1.24895	2.20277	1.20349			3.5462	0.874171	1.16172	0.943369	0.995032	1.12924	1.14747
T25.S25	D20	2	1.73765	14.559	1.86762	3.37451	2.01969	6.1375	3.10407	5.32001	1.30981	1.07172	2.03895	0.720782	1.15859	2.23155	1.39569			4.26821	0.885184	1.09169	0.938343	1.06462	1.18722	1.43361
T25.S25	D20	3	1.49885	12.5975	1.59169	3.30875	2.2151	5.82884	3.45849	4.94946	1.35455	1.65856	2.21582	0.807295	1.29093	2.99403	1.41512			5.19319	1.2725	1.4292	1.07425	1.2296	1.48504	1.66729
T25.S25	D20	4	1.55179	12.9108	1.83496	3.50092	2.1472	6.76723	3.57635	5.36492	1.36177	1.39031	2.54261	0.808071	1.32421	3.12976	1.41689			3.73066	1.22503	1.32841	1.04546	1.15112	1.24335	1.33724
T25.S25	D20	5	1.69837	14.1421	2.08322	3.87416	2.26528	7.9742	4.06457	5.95952	1.31559	1.44995	2.30941	0.763241	1.12493	2.68529	1.79133			5.25113	1.29926	1.35507	0.995136	1.40581	1.34635	1.31219
T20.S15	D40	1	1.49822	13.1675	1.53672	4.53944	2.20381	5.21496	3.00733	5.17722	1.28794	1.11053	2.03627	0.762281	1.36591	2.82693	1.46832	0.861248	0.938103	5.9331	1.35512	1.33275	1.11354	1.34908	1.41763	3.05455
T20.S15	D40	2	1.56122	13.3813	1.56691	4.36738	2.36747	6.35397	3.55112	5.68228	1.43321	1.45024	2.64015	0.806784	1.6031	3.95481	1.72327	0.875757	0.921157	6.72077	1.73293	1.63131	1.25522	1.50849	1.589	3.61662
T20.S15	D40	3	2.00546	17.8635	2.45256	5.16009	2.77873	8.77568	4.80749	8.38682	1.90172	1.66548	3.74107	0.889529	1.63968	6.23138	2.59039	0.948808	1.0039	10.1932	2.06321	1.76405	1.26287	2.40109	2.05524	5.24055
T20.S15	D40	4	1.44908	10.9599	1.36677	3.50715	2.37898	4.59896	3.14426	4.22139	1.25939	1.44159	2.21771	0.801212	1.35849	3.46851	1.71997	0.877211	0.985544	6.32482	2.19008	1.618	1.24847	1.67109	1.50133	3.30819
T20.S15	D40	5	1.76844	15.0412	1.74178	4.26977	2.61113	6.45323	4.38839	6.31084	1.63899	1.92373	3.17011	0.885644	1.44076	6.21283	2.78956	0.97064	1.07757	9.81084	2.02346	2.13737	1.48981	2.56014	2.12324	4.24216
T20.S20	D40	1	2.2768	18.588	2.61013	4.99958	2.71949	9.16426	5.13573	8.96022	1.96699	1.74508	3.61795	0.919971	1.81942	6.47879	2.49889	0.983794	0.968487	10.8565	1.71653	1.95519	1.51399	2.16352	2.23491	6.0003
T20.S20	D40	2	1.08229	11.5173	1.28416	3.18631	2.50637	4.00615	3.13006	4.00705	1.2303	1.72608	1.95545	0.781017	1.4025	3.73618	1.81088	0.913136	0.932798	7.76055	1.22575	1.77587	1.33372	1.50347	1.62103	2.40257
T20.S20	D40	3	1.80082	16.5589	2.31772	4.28288	2.85529	7.13534	4.42971	7.0902	1.7056	1.65362	2.86841	0.830272	1.82993	5.13974	2.32137	0.941935	1.01691	9.55329	1.48766	1.81755	1.4029	1.98237	2.01471	4.76184
T20.S20	D40	4	1.5291	13.9955	1.69614	4.00423	2.95696	6.00538	4.08498	5.0221	1.48519	1.72124	3.1396	0.832928	1.79266	5.63029	2.26032	0.946854	1.02308	8.50902	1.43672	2	1.43177	2.52453	2.08894	3.65178
T20.S20	D40	5	1.77514	15.1364	2.32774	4.12017	2.63548	8.48751	4.65263	7.70818	1.69127	1.68852	3.46998	0.862431	1.71659	5.50463	2.00149	0.938244	1.0623	7.9696	1.8649	1.91097	1.40388	1.82856	1.83288	4.32928
T20.S25	D40	1	1.62061	13.1139	1.36415	4.36884	2.60925	5.83772	3.92344	5.8762	1.62759	1.99328	2.81663	0.872863	1.52731	6.04108	1.85794	0.962742	0.99754	8.49248	1.73098	2.12014	1.63623	1.83866	1.98859	4.39554
T20.S25	D40	2	1.43817	12.8076	1.52873	4.05277	2.72565	5.74609	3.93008	5.32075	1.46968	1.74944	2.84074	0.827779	1.651	5.51188	1.95762	0.927334	1.01332	8.50501	1.51873	2.07845	1.56301	1.96379	1.99394	3.91422
T20.S25	D40	3	1.25387	11.6825	1.34906	3.76069	2.45002	4.97944	3.6163	5.06612	1.4322	1.67272	2.30392	0.830294	1.37579	4.86202	1.94242	0.960032	0.998348	10.0765	1.55529	2.01653	1.40951	2.22395	2.1017	3.24455
T20.S25	D40	4	1.70351	12.9733	1.61241	4.04842	2.89275	5.91951	3.84848	5.77122	1.63986	1.91531	2.6263	0.854439	1.5654	5.13575	2.18615	0.957522	1.04882	8.49442	1.32711	2.10933	1.4847	2.55129	2.17016	3.53148
T20.S25	D40	5	2.0331	14.8804	1.79575	4.374	3.01815	8.20147	4.84723	7.84572	1.94183	2.04512	3.42824	0.927304	1.65765	6.36141	2.35099	1.02425	1.15798	10.1692	2.02414	2.23163	1.61921	2.36413	2.31904	4.8302
T25.S15	D40	1	1.45561	14.2408	1.76626	3.85823	2.92931	5.42717	4.03073	4.13204	1.44696	1.88303	3.15745	0.815411	1.91879	5.5568	1.8271	0.963293	0.95325	7.44691	1.08063	2.20284	1.65574	1.86574	2.07613	2.86241
T25.S15	D40	2	1.82046	16.5034	1.94957	4.29382	2.60563	7.40963	4.28885	6.42136	1.58154	1.76381	3.1901	0.835338	1.69144	4.76942	2.0003	0.916884	0.926503	8.96654	1.8419	1.89946	1.37908	2.06751	2.07561	3.95922
T25.S15	D40	3	2.10063	19.1212	2.34841	4.84927	2.84635	8.43382	5.00589	7.28878	1.80967	1.83606	3.96925	0.898154	2.04193	6.46104	2.50526	0.978118	1.042	9.54698	1.65789	2.0401	1.48275	2.56643	2.27374	4.56248
T25.S15	D40	4	1.12956	9.93727	1.14501	2.78185	2.55975	3.82299	2.85977	3.60604	1.34745	1.68117	2.00988	0.810205	1.51683	3.69322	1.99759	0.929933	0.918096	7.5729	1.6386	1.91703	1.43159	2.09734	1.81644	2.78816
T25.S15	D40	5	1.46859	13.4137	1.50267	3.59653	2.39611	5.62223	3.46437	4.96615	1.4542	1.56398	2.56206	0.850079	1.59815	4.22744	2.58369	0.896321	1.00904	7.33129	1.48018	1.80723	1.25777	2.55166	1.80717	2.81502
T25.S20	D40	1	1.8295	12.8462	1.34113	4.21752	2.23109	6.35705	3.44881	5.69426	1.47174	1.30529	2.4495	0.819433	1.55053	3.61922	1.63772	0.863511	0.949767	6.44145	2.35505	1.57661	1.33916	1.56946	1.61545	3.37878
T25.S20	D40	2	1.36478	12.2742	1.00294	3.20528	2.28718	4.3077	3.29104	3.76411	1.35299	1.75159	2.22188	0.788715	1.46061	4.57972	1.80585	0.940966	0.939309	7.41288	1.97575	1.95364	1.38112	1.94621	1.78335	3.11178
T25.S20	D40	3	1.47344	14.1078	1.74756	4.26694	2.80914	7.01783	4.5297	6.02343	1.70147	1.95889	3.7486	0.867013	1.90569	6.95134	1.96657	0.993834	1.02294	9.1685	1.90816	2.2596	1.73081	2.26612	2.39702	4.76986
T25.S20	D40	4	1.0726	9.34892	0.954766	2.9595	2.53519	3.74489	2.81128	2.9248	1.24277	1.83742	1.89032	0.788739	1.36262	3.48485	2.03786	0.908895	0.970855	7.16183	1.98208	1.78617	1.29448	1.98627	1.72023	3.04703
T25.S20	D40	5	1.21914	12.8343	1.26455	3.66055	2.46168	4.64788	3.69109	3.64885	1.33872	1.9464	2.61684	0.797112	1.43429	4.67367	2.46684	0.926422	0.97051	8.45993	1.22562	2.00905	1.28946	2.6308	2.28448	2.81521
T25.S25	D40	1	1.08365	10.4555	1.42317	3.03674	2.53538	3.48573	3.10554	2.53355	1.20826	1.71886	2.2614	0.777835	1.51717	4.10302	1.58058	0.919412	0.968765	5.80252	0.911612	1.92585	1.45921	1.73	1.81114	2.06527
T25.S25	D40	2	1.95448	16.5389	2.25785	4.27371	2.71343	8.56094	4.91338	7.2806	1.75582	1.55071	3.82763	0.849479	1.91685	6.06893	2.07426	0.929696	1.02038	8.20408	1.67372	1.91137	1.58643	2.0685	2.15525	4.14438
T25.S25	D40	3	1.58426	14.2875	1.87181	3.72052	2.49551	7.19728	4.23668	6.25322	1.61253	1.51991	3.02392	0.828019	1.78613	5.47381	1.87939	0.937444	1.02614	8.46288	1.47439	1.9154	1.55374	2.04949	2.14351	3.89313
T25.S25	D40	4	2.45828	17.7411	2.95507	4.30713	2.7678	10.7584	5.79424	9.53605	2.1135	1.883	4.2241	0.91046	2.19296	7.0321	2.08288	0.977715	1.20051	9.87875	1.99186	2.19211	1.88649	1.88737	2.35376	5.62791
T25.S25	D40	5	2.24509	19.6873	2.55866	4.42523	2.71475	8.99221	5.48781	8.57485	1.97619	2.02594	3.82399	0.869541	1.97352	7.41726	3.34365	0.991411	1.22472	10.3491	1.519	2.19674	1.494	3.1458	2.48669	5.03596

## Sheet: SUM Fatty acids
Total fatty acids (FA) concentration, sum of FA classes (SFA, MUFA, PUFA and HUFA) and sum of n-3 and n-6 FA (µg mg-1 DW) of Hediste diversicolor fed a commercial aquafeed for 10, 20 and 40 days (D10, D20 and D40) under different combinations of water temperature (T – 20 and 25 ºC) and salinity (S – 15, 20 and 25) contrasted with that wild conspecifics initially stocked (Initial) and wild conspec…
Treatment	Samples	Replicate	Total	n-3	n-6	SFA	MUFA	PUFA	HUFA
T20.S15	D10	1	33.7496	7.08915	5.67025	7.26052	11.4051	6.15121	8.93283
T20.S15	D10	2	38.0474	6.46184	6.32674	9.9621	12.967	6.74286	8.37546
T20.S15	D10	3	39.0183	6.9367	6.27305	10.0287	13.5641	6.86762	8.55791
T20.S15	D10	4	44.4045	8.50521	8.2431	10.4262	14.6167	8.41406	10.9475
T20.S15	D10	5	41.825	7.33758	6.86739	11.6545	13.4031	7.58145	9.18596
T20.S20	D10	1	46.4656	8.7418	8.35343	10.8692	15.9246	8.89258	10.7793
T20.S20	D10	2	26.0564	4.6393	4.0119	5.03752	10.3095	5.04778	5.66163
T20.S20	D10	3	45.1757	9.23732	7.46151	11.0706	14.986	8.27454	10.8445
T20.S20	D10	4	34.7329	5.606	5.85538	7.87951	13.2327	6.78131	6.8394
T20.S20	D10	5	33.5017	4.84199	4.54474	9.77875	12.2962	5.40378	6.02295
T20.S25	D10	1	34.416	5.22738	5.69115	9.03374	12.2056	6.50472	6.67192
T20.S25	D10	2	32.3229	4.51736	4.25463	9.21261	12.0879	5.61949	5.40297
T20.S25	D10	3	51.8191	8.76465	8.45355	15.4184	16.6838	8.99999	10.7169
T20.S25	D10	4	33.3429	5.1104	5.42692	8.45669	12.0359	6.43788	6.4124
T20.S25	D10	5	41.5743	6.51822	6.73896	10.837	15.0649	7.86301	7.80944
T25.S15	D10	1	36.9907	4.87195	4.78415	13.8642	11.3334	5.8953	5.89784
T25.S15	D10	2	37.7296	5.94468	6.21701	10.1427	13.0559	7.22718	7.30378
T25.S15	D10	3	30.5559	5.84858	4.84376	7.01143	10.6668	5.8668	7.01091
T25.S15	D10	4	45.3371	7.1286	6.60991	15.7206	13.4605	7.36324	8.79282
T25.S15	D10	5	42.7399	7.7479	7.27783	11.2336	14.0347	8.08266	9.38897
T25.S20	D10	1	51.1741	7.68033	7.82943	18.0863	15.3372	8.55048	9.20007
T25.S20	D10	2	47.8471	8.02135	7.51752	15.0011	14.8333	8.32423	9.68846
T25.S20	D10	3	39.8743	5.38959	4.57822	13.0386	14.3618	6.089	6.38497
T25.S20	D10	4	41.0192	8.70657	6.40947	9.97055	13.4925	7.27919	10.2769
T25.S20	D10	5	45.3003	8.27022	7.05647	12.0626	15.4171	8.10555	9.71503
T25.S25	D10	1	51.4105	8.60016	8.06693	14.2918	17.8343	9.10134	10.183
T25.S25	D10	2	50.3031	6.51762	7.03272	15.0847	19.0265	8.2657	7.92627
T25.S25	D10	3	39.5394	6.65375	5.96508	10.5622	13.9149	6.82395	8.23833
T25.S25	D10	4	50.1445	9.4232	8.22731	13.2599	16.5609	8.89732	11.4264
T25.S25	D10	5	42.5561	5.58248	5.26262	12.9046	16.3018	6.46824	6.88141
T20.S15	D20	1	53.6134	7.76742	9.08517	15.576	17.5774	11.2267	9.23327
T20.S15	D20	2	62.3624	10.6553	11.3444	17.1916	19.319	13.3775	12.4743
T20.S15	D20	3	66.1225	10.631	12.084	18.7836	20.8369	14.2048	12.2972
T20.S15	D20	4	45.5149	4.65846	4.60151	15.3055	17.556	7.17968	5.47376
T20.S15	D20	5	63.87	6.9905	10.4027	19.8859	23.0131	12.4792	8.49175
T20.S20	D20	1	64.2729	5.60983	10.4887	21.6262	23.0574	13.3131	6.27626
T20.S20	D20	2	49.7052	5.35337	7.48114	15.9392	17.4078	9.90396	6.4543
T20.S20	D20	3	68.0814	8.75784	12.8943	19.0627	23.3815	15.318	10.3192
T20.S20	D20	4	53.103	5.09503	7.20966	17.2804	20.0805	9.70581	6.0364
T20.S20	D20	5	77.2506	10.3686	14.7776	22.0917	26.0332	17.2744	11.8512
T20.S25	D20	1	72.8127	9.28633	12.6508	21.7451	24.9678	15.8063	10.2935
T20.S25	D20	2	65.5945	8.06685	11.6528	18.3258	23.7485	13.9404	9.57985
T20.S25	D20	3	73.5691	10.9484	12.1042	23.5981	22.9565	14.502	12.5125
T20.S25	D20	4	63.6395	9.88346	11.4522	17.4885	21.1284	13.9327	11.0899
T20.S25	D20	5	56.2267	6.81432	8.38671	17.0353	20.3499	11.1028	7.73866
T25.S15	D20	1	49.3849	6.97165	8.20934	15.1431	15.7617	10.3868	8.09331
T25.S15	D20	2	87.1803	7.84045	13.5084	34.8684	27.2405	16.3808	8.69057
T25.S15	D20	3	68.4185	9.5484	10.999	24.2304	20.2133	13.3333	10.6415
T25.S15	D20	4	71.5242	7.6867	11.0329	28.658	20.8347	13.1845	8.84706
T25.S15	D20	5	59.0258	6.99789	8.90922	21.994	17.989	11.0683	7.9745
T25.S20	D20	1	55.7217	7.01065	8.33525	20.4529	16.7955	10.6742	7.79912
T25.S20	D20	2	48.6428	7.39823	8.48094	14.0468	15.6353	10.5141	8.44671
T25.S20	D20	3	54.675	8.69186	9.60002	15.6286	17.2114	11.861	9.9741
T25.S20	D20	4	85.5745	13.4901	16.2201	25.9134	25.4136	18.9344	15.3131
T25.S20	D20	5	52.3319	8.31244	9.05775	15.7027	16.0944	11.0142	9.52064
T25.S25	D20	1	56.4018	7.06353	9.83041	17.9404	18.2134	12.2266	8.02143
T25.S25	D20	2	58.916	8.19884	10.0119	19.6712	17.8455	12.05	9.34935
T25.S25	D20	3	60.5361	9.70007	10.5882	17.4051	19.0483	13.0924	10.9902
T25.S25	D20	4	60.689	7.67301	11.0627	17.9635	20.2918	13.5545	8.87926
T25.S25	D20	5	66.4661	9.22527	11.8419	19.7147	22.2091	13.4355	11.1068
T20.S15	D40	1	64.5585	13.4926	10.8215	19.2052	17.227	13.9655	14.1608
T20.S15	D40	2	72.2944	15.1565	12.8688	19.3099	20.4696	16.4357	16.0793
T20.S15	D40	3	97.8225	21.3434	19.6097	25.0291	27.1737	22.1353	23.4844
T20.S15	D40	4	63.6181	14.2565	11.081	15.9161	18.1396	14.0515	15.5109
T20.S15	D40	5	87.0817	19.8635	17.8734	21.0794	23.1975	20.2012	22.6035
T20.S20	D40	1	101.895	23.011	20.1014	25.8644	27.6291	23.6784	24.7226
T20.S20	D40	2	62.831	14.8604	11.0576	15.7859	16.615	14.3988	16.0313
T20.S20	D40	3	87.799	19.9943	16.5337	22.6426	23.578	19.9279	21.6505
T20.S20	D40	4	79.7693	17.7049	15.4372	19.5288	21.8739	18.3089	20.0577
T20.S20	D40	5	86.9187	17.8236	17.0429	21.0317	25.9892	20.8738	19.0241
T20.S25	D40	1	79.6137	18.4645	15.6139	19.1034	21.1483	19.7913	19.5708
T20.S25	D40	2	77.0357	17.8235	14.7541	18.2985	20.8672	18.5221	19.3479
T20.S25	D40	3	73.1638	18.8134	14.0945	16.697	18.757	17.1222	20.5875
T20.S25	D40	4	78.3677	17.8423	15.6444	18.7253	20.9963	18.6638	19.9823
T20.S25	D40	5	93.4481	21.4425	18.9222	21.2875	26.2874	22.6817	23.1915
T25.S15	D40	1	75.5526	15.749	13.3817	19.5546	21.09	17.8765	17.0315
T25.S15	D40	2	85.1574	18.4263	15.2586	22.6177	23.8848	18.6592	19.9957
T25.S15	D40	3	97.6662	20.213	18.8215	26.0711	26.9958	22.1024	22.4969
T25.S15	D40	4	62.0087	15.373	11.3942	13.8487	16.5274	14.4421	17.1905
T25.S15	D40	5	72.2256	15.313	14.3289	18.4788	19.4417	16.2073	18.0979
T25.S20	D40	1	70.9082	14.7207	12.5207	18.8932	20.3073	16.115	15.5926
T25.S20	D40	2	66.9036	15.5413	12.0959	16.8443	17.6268	15.4332	16.9994
T25.S20	D40	3	87.5922	20.0536	17.2075	19.8482	24.5869	21.5662	21.591
T25.S20	D40	4	59.8543	15.0516	10.4338	13.381	16.5447	13.0046	16.9241
T25.S20	D40	5	71.3134	16.7953	13.4202	17.714	18.6512	15.3205	19.6278
T25.S25	D40	1	58.4201	12.7754	9.94714	14.5759	16.2195	13.6665	13.9583
T25.S25	D40	2	90.2307	18.2096	17.4923	22.767	26.3471	21.4497	19.6669
T25.S25	D40	3	81.2266	18.0756	15.6559	19.5922	22.6475	19.5323	19.4545
T25.S25	D40	4	104.754	22.1521	20.5384	24.5065	31.2849	25.9309	23.0312
T25.S25	D40	5	104.559	22.0641	22.4816	26.3577	27.9919	24.624	25.5859
Wild10	D10	1	28.6344	6.32376	5.08965	6.72651	9.30555	3.8364	7.72987
Wild10	D10	2	32.1846	7.44007	5.8715	7.05029	9.79561	4.01557	8.08393
Wild10	D10	3	31.4295	7.12759	6.21274	7.42228	9.52984	3.79106	7.8011
Wild10	D10	4	28.5617	6.17929	5.57776	6.87532	9.96124	3.86141	7.77427
Wild10	D10	5	29.3508	6.64131	5.82825	6.89269	9.68849	3.94856	7.66072
Wild20	D20	1	30.3649	6.74494	5.47166	7.47756	9.46623	4.10234	9.31873
Wild20	D20	2	29.3466	6.38786	5.12725	7.07564	9.59956	3.95485	8.71658
Wild20	D20	3	28.0789	5.79459	4.70719	7.02008	9.40157	3.78152	7.87575
Wild20	D20	4	31.5259	6.88014	5.29324	8.38998	9.78078	3.97942	9.37575
Wild20	D20	5	32.7334	8.08774	6.01555	7.74163	9.61559	4.23946	11.1367
Wild40	D40	1	32.5266	6.51764	5.68026	9.40237	9.81309	3.97556	9.33556
Wild40	D40	2	32.9933	5.96077	5.16737	10.5679	10.2196	3.94831	8.2575
Wild40	D40	3	32.2325	6.16843	5.26877	9.794	9.92234	3.90602	8.6101
Wild40	D40	4	33.7899	5.27294	4.36128	12.8624	10.2712	3.65338	7.00285
Wild40	D40	5	32.8228	6.1136	4.86843	10.3888	10.3681	3.8218	8.24412
Initial		1	27.5983	5.7189	4.76959	6.72651	9.30555	3.8364	7.72987
Initial		2	28.9454	5.86368	5.12272	7.05029	9.79561	4.01557	8.08393
Initial		3	28.5443	5.84645	4.68189	7.42228	9.52984	3.79106	7.8011
Initial		4	28.4722	5.5341	4.9451	6.87532	9.96124	3.86141	7.77427
Initial		5	28.1905	5.4852	4.95978	6.89269	9.68849	3.94856	7.66072
Aquafeed		1	91.8664	16.849	13.4003	30.8998	30.7173	14.8378	15.4114
Aquafeed		2	102.202	18.3445	14.848	35.4433	33.566	16.4717	16.7208
Aquafeed		3	109.608	20.0365	16.259	36.7011	36.6111	18.1495	18.146
Aquafeed		4	116.067	21.2559	17.0379	38.2205	39.5523	19.0723	19.2215
Aquafeed		5	111.123	20.9891	16.7956	35.9633	37.3755	18.7336	19.051

## Sheet: FR; SGR; DGR
Feeding Rate (FR), Specific Growth Rate (SGR) and Daily Growth Rate (DGR) of Hediste diversicolor fed during 10, 20 and 40 days (D10, D20 and D40) with a commercial aquafeed under different combinations of temperature (T – 20 and 25 ºC) and salinity (S – 15, 20 and 25).
Treatment	Samples	Replicate	SGR (%d-1)	FR (%)	DGR (g d-1)
T25.S15	D10	1	2.93358	1.46515	0.134092
T25.S15	D10	2	3.82866	1.48951	0.146648
T25.S15	D10	3	4.26126	1.47487	0.153131
T25.S15	D10	4	3.34576	1.45838	0.139735
T25.S15	D10	5	2.59475	1.50795	0.129625
T25.S20	D10	1	2.8444	1.41991	0.132902
T25.S20	D10	2	3.85454	1.38633	0.147028
T25.S20	D10	3	3.59928	1.47755	0.143323
T25.S20	D10	4	4.30857	1.57399	0.153858
T25.S20	D10	5	2.08902	1.44795	0.123232
T25.S25	D10	1	3.91256	1.41747	0.147884
T25.S25	D10	2	4.9298	1.51955	0.163719
T25.S25	D10	3	2.0705	1.39855	0.123004
T25.S25	D10	4	3.26777	1.60421	0.138649
T25.S25	D10	5	2.21889	1.46396	0.124843
T20.S15	D10	1	2.78545	1.51349	0.132121
T20.S15	D10	2	2.8808	1.50585	0.133386
T20.S15	D10	3	3.88434	1.53919	0.147467
T20.S15	D10	4	4.32794	1.46684	0.154156
T20.S15	D10	5	3.45932	1.44088	0.141331
T20.S20	D10	1	4.29825	1.64128	0.153699
T20.S20	D10	2	6.86234	1.5388	0.198622
T20.S20	D10	3	2.53125	1.44932	0.128804
T20.S20	D10	4	4.06559	1.43891	0.150164
T20.S20	D10	5	4.19303	1.55934	0.15209
T20.S25	D10	1	5.01922	1.47232	0.165189
T20.S25	D10	2	5.2307	1.45468	0.16872
T20.S25	D10	3	3.86092	1.49178	0.147122
T20.S25	D10	4	1.09923	1.47387	0.111619
T20.S25	D10	5	2.8836	1.61448	0.133424
T25.S15	D20	1	3.14493	1.85282	0.0937853
T25.S15	D20	2	3.84651	1.85491	0.107913
T25.S15	D20	3	3.96361	1.81558	0.11047
T25.S15	D20	4	3.32591	1.77464	0.0972422
T25.S15	D20	5	3.55657	1.88173	0.101833
T25.S20	D20	1	2.56804	1.75305	0.0835655
T25.S20	D20	2	2.79519	1.67254	0.0874494
T25.S20	D20	3	2.90054	1.68997	0.0893116
T25.S20	D20	4	2.75273	1.82765	0.08671
T25.S20	D20	5	3.00117	1.85272	0.0911273
T25.S25	D20	1	2.02119	1.78099	0.074908
T25.S25	D20	2	2.4754	1.83757	0.0820315
T25.S25	D20	3	3.4561	1.83454	0.0998074
T25.S25	D20	4	3.69668	1.86593	0.104727
T25.S25	D20	5	4.37372	1.65282	0.119913
T20.S15	D20	1	5.49377	1.75025	0.150021
T20.S15	D20	2	3.62201	1.77778	0.103175
T20.S15	D20	3	4.08275	1.93895	0.113134
T20.S15	D20	4	5.41253	1.85612	0.147603
T20.S15	D20	5	4.44729	1.87446	0.121691
T20.S20	D20	1	2.80652	1.9414	0.0876478
T20.S20	D20	2	5.78258	1.83337	0.158942
T20.S20	D20	3	3.78127	1.93238	0.106514
T20.S20	D20	4	1.03588	1.90884	0.0615099
T20.S20	D20	5	3.88696	1.72163	0.108789
T20.S25	D20	1	4.06265	1.73349	0.11268
T20.S25	D20	2	3.44588	1.85029	0.0996037
T20.S25	D20	3	2.79745	1.87858	0.0874889
T20.S25	D20	4	3.83903	1.85002	0.107752
T20.S25	D20	5	3.54383	1.78625	0.101574
T25.S15	D40	1	1.66836	2.39993	0.0487263
T25.S15	D40	2	3.03946	2.19693	0.0843235
T25.S15	D40	3	3.20668	2.21558	0.0901565
T25.S15	D40	4	2.81785	2.4869	0.0771705
T25.S15	D40	5	2.46526	2.36647	0.0670193
T25.S20	D40	1	3.26797	2.43677	0.0923943
T25.S20	D40	2	2.8923	2.29614	0.0795032
T25.S20	D40	3	2.99757	2.25981	0.0829223
T25.S20	D40	4	1.64282	2.24469	0.0482311
T25.S20	D40	5	1.39382	2.35774	0.0436588
T25.S25	D40	1	1.98492	2.25989	0.055304
T25.S25	D40	2	3.71851	2.37154	0.11064
T25.S25	D40	3	2.13381	2.41009	0.0586977
T25.S25	D40	4	3.46067	2.46757	0.0997977
T25.S25	D40	5	3.38324	2.38444	0.0967541
T20.S15	D40	1	3.16804	2.52175	0.0887737
T20.S15	D40	2	3.789	2.51999	0.113804
T20.S15	D40	3	3.04451	2.20544	0.0844939
T20.S15	D40	4	3.23356	2.42251	0.0911311
T20.S15	D40	5	2.47877	2.35929	0.0673824
T20.S20	D40	1	3.33626	2.35261	0.0949527
T20.S20	D40	2	3.42232	2.42397	0.0982783
T20.S20	D40	3	3.42231	2.32692	0.0982779
T20.S20	D40	4	3.50718	2.45191	0.101672
T20.S20	D40	5	3.02431	2.32906	0.0838139
T20.S25	D40	1	3.31095	2.47997	0.0939962
T20.S25	D40	2	2.97388	2.39212	0.0821404
T20.S25	D40	3	3.1736	2.53236	0.0889713
T20.S25	D40	4	2.60838	2.33933	0.070968
T20.S25	D40	5	2.76756	2.31199	0.0756335
